# Supplementary material for: Neuropsychological Test Performance of Cognitively Healthy Centenarians: Normative Data From the Dutch 100‐Plus Study
Source: PubMed Central journal article supplement — J Am Geriatr Soc. 2018 Dec 27;67(4):759–67. doi: 10.1111/jgs.15729 (PMC7379661; doi:10.1111/jgs.15729), 2018-12-27
Supplement: JGS-67-759-s001.pdf [file JGS-67-759-s001.pdf]

**Table S1. Categorization of vision and hearing**

|                  | <b>Vision</b>                                                                        | <b>Hearing</b>                                                                                                       |
|------------------|--------------------------------------------------------------------------------------|----------------------------------------------------------------------------------------------------------------------|
| <u>Good</u>      | Able to read newspapers and watch television                                         | Able to have and follow a conversation in a group of people                                                          |
| <u>Moderate</u>  | Able to read texts with large letters and watch television                           | Able to have a conversation with one person/questions do not have to be repeated                                     |
| <u>Poor</u>      | Not able to read and watch television/vision problems cause some difficulties in ADL | Limited ability to have a conversation with one person/questions need to be repeated several times with a loud voice |
| <u>Very poor</u> | Limited or complete loss of vision which causes severe difficulties in ADL           | Not able to have a conversation with one person; this does not improve when speaking loud and clearly                |

ADL=Activities of daily living.

**Table S2. Measurement properties of the neuropsychological tests**

| <b>Test</b>          | <b>Internal consistency</b>                     | <b>Test-retest reliability</b>   |
|----------------------|-------------------------------------------------|----------------------------------|
| MMSE                 | Cronbach's $\alpha$ = .62 to .81 <sup>1</sup>   | $r$ = .83 to .99 <sup>2,3</sup>  |
| RBMT                 | Cronbach's $\alpha$ = .87 to .91 <sup>4</sup>   | $r$ = .80 to .89 <sup>1,3</sup>  |
| VAT Trial 1+2        | Cronbach's $\alpha$ = .88 <sup>5</sup>          | $r$ = .81 <sup>6</sup>           |
| Digit Span           | Cronbach's $\alpha$ = .90 <sup>7</sup>          | $r$ = .66 to .89 <sup>3,8</sup>  |
| TMT A & B            | n.a.                                            | $r$ = .60 to .90 <sup>3</sup>    |
| Letter Fluency       | Cronbach's $\alpha$ = .82 <sup>9</sup>          | $r$ = .70 to .88 <sup>3,8</sup>  |
| Animal Fluency       | Cronbach's $\alpha$ = .77 <sup>7</sup>          | $r$ = .79 <sup>8</sup>           |
| BADS Key Search      | Cronbach's $\alpha$ = .60 <sup>1*</sup>         | $r$ = .64 to .71 <sup>1,3</sup>  |
| DART                 | Cronbach's $\alpha$ = .91 <sup>10</sup>         | $r$ = .81 <sup>10</sup>          |
| Clock Drawing        | Cronbach's $\alpha$ = .90 <sup>11</sup>         | $r$ = .39 to .94 <sup>8,12</sup> |
| VOSP Number Location | Cronbach's $\alpha$ = .80 to .89 <sup>1,7</sup> | $r$ = .88 <sup>1</sup>           |

$r$ =test-retest reliability correlation coefficient. n.a.=not available. \*For the total BADS. MMSE=Mini-Mental State Examination. RBMT=Rivermead Behavioural Memory Test. VAT=Visual Association Test. TMT=Trail Making Test. BADS=Behavioural Assessment of the Dysexecutive Syndrome Test. DART= Dutch version of the National Adult Reading Test. VOSP=Visual Object and Space Perception Battery.

**Table S3. Regression coefficients for sex, age, and education**

The table below represents the regression coefficients for sex, age, and education. Regression-based normative data can be obtained from the regression coefficients by calculating standardized z-scores, using formulas of regression (Table S4). First, a predicted score based on sex, age, and education can be computed as follows:  $y \sim \beta_0 + Sex(female) * \beta_1 + Age * \beta_2 + Education * \beta_3$ . The difference between the predicted score and the observed score results in a residual score ( $e$ ), which can be computed into standardized residual (z-score) using the Standard Error of the Estimate ( $SD(e)$ ):  $Z = e / SD(e)$ <sup>13</sup>. The z-score represents the number of standard deviations the obtained score deviates from the expected score. In addition, in the attached excel file the observed scores on the cognitive tests can be imported of which the z-scores are calculated automatically.

| <b>Test</b>                      | <b>B (Sex)</b> | <b>B (Age)</b> | <b>B (Education)</b> | <b>Intercept</b> | <b>SD(e)</b> |
|----------------------------------|----------------|----------------|----------------------|------------------|--------------|
| MMSE                             | -0.60211       | -0.282791213   | 0.505103791          | 53.21103         | 3.016        |
| RBMT Immediate Recall            | -0.63678       | -0.104713469   | 0.612759249          | 18.02674         | 4.558        |
| RBMT Delayed Recall              | -0.70255       | -0.102838417   | 0.451041123          | 14.83272         | 4.363        |
| Key Search                       | -1.70949       | -0.044886954   | 0.752795169          | 10.43155         | 3.338        |
| Letter Fluency                   | 3.741579       | -0.010157815   | 2.658901981          | 15.29493         | 9.611        |
| Animal Fluency 1 min             | 1.239838       | -0.172348155   | 0.535242321          | 26.42796         | 4.139        |
| Animal Fluency 2 min             | 1.724357       | -0.259350555   | 0.942601692          | 39.5249          | 6.481        |
| Digit Span Forward <i>score</i>  | -0.58947       | 0.093607915    | 0.414156417          | -3.06967         | 1.661        |
| Digit Span Forward <i>span</i>   | -0.14698       | 0.033269079    | 0.227584613          | 1.163012         | 1.002        |
| Digit Span Backward <i>score</i> | 0.195736       | 0.010612323    | 0.22764657           | 2.796924         | 1.395        |
| Digit Span Backward <i>span</i>  | 0.121287       | -0.041349559   | 0.123681852          | 7.524261         | 0.894        |
| TMT A <i>time</i>                | 0.04509        | -0.099396142   | 0.047727321          | 5.25199          | 0.463        |
| TMT B <i>time</i>                | 0.225416       | -0.046358495   | 0.061437269          | -1.28086         | 0.499        |

Values are presented as unstandardized Beta ( $B$ ).  $SD(e)$ =Standard Error of the Estimate. MMSE=Mini-Mental State Examination. RBMT=Rivermead Behavioural Memory Test. TMT=Trail Making Test. TMT scores were log-transformed.

**Table S4. Regression formulas to calculate regression-based norms**

---

|                                                                                                                                                                        |
|------------------------------------------------------------------------------------------------------------------------------------------------------------------------|
| $Z_{\text{MMSE}} = (\text{observed score} - (\text{sex}(\text{female}) * -0.602 + \text{age} * -0.283 + \text{education} * 0.505 + 53.211)) / 3.016$                   |
| $Z_{\text{RBMT Immediate Recall}} = (\text{observed score} - (\text{sex}(\text{female}) * -0.637 + \text{age} * -0.105 + \text{education} * 0.613 + 18.027)) / 4.558$  |
| $Z_{\text{RBMT Delayed Recall}} = (\text{observed score} - (\text{sex}(\text{female}) * -0.703 + \text{age} * -0.103 + \text{education} * 0.451 + 14.833)) / 4.363$    |
| $Z_{\text{Key Search}} = (\text{observed score} - (\text{sex}(\text{female}) * -1.709 + \text{age} * -0.045 + \text{education} * 0.753 + 10.432)) / 3.338$             |
| $Z_{\text{Letter Fluency}} = (\text{observed score} - (\text{sex}(\text{female}) * 3.742 + \text{age} * -0.01 + \text{education} * 2.659 + 15.295)) / 9.611$           |
| $Z_{\text{Animal Fluency 1min}} = (\text{observed score} - (\text{sex}(\text{female}) * 1.24 + \text{age} * -0.172 + \text{education} * 0.535 + 26.428)) / 4.139$      |
| $Z_{\text{Animal Fluency 2min}} = (\text{observed score} - (\text{sex}(\text{female}) * 1.724 + \text{age} * -0.259 + \text{education} * 0.943 + 39.525)) / 6.481$     |
| $Z_{\text{Digit Span Forward score}} = (\text{observed score} - (\text{sex}(\text{female}) * -0.589 + \text{age} * 0.094 + \text{education} * 0.414 + -3.07)) / 1.661$ |
| $Z_{\text{Digit Span Forward span}} = (\text{observed score} - (\text{sex}(\text{female}) * -0.147 + \text{age} * 0.033 + \text{education} * 0.228 + 1.163)) / 1.002$  |
| $Z_{\text{Digit Span Backward score}} = (\text{observed score} - (\text{sex}(\text{female}) * 0.196 + \text{age} * 0.011 + \text{education} * 0.228 + 2.797)) / 1.395$ |
| $Z_{\text{Digit Span Backward span}} = (\text{observed score} - (\text{sex}(\text{female}) * 0.121 + \text{age} * -0.041 + \text{education} * 0.124 + 7.524)) / 0.894$ |
| $Z_{\text{TMT A}} = (-1 * \text{LN}(\text{observed score}) - (\text{sex}(\text{female}) * 0.045 + \text{age} * -0.099 + \text{education} * 0.048 + 5.252)) / 0.463$    |
| $Z_{\text{TMT B}} = (-1 * \text{LN}(\text{observed score}) - (\text{sex}(\text{female}) * 0.225 + \text{age} * -0.046 + \text{education} * 0.061 + -1.281)) / 0.499$   |

---

MMSE=Mini-Mental State Examination. RBMT=Rivermead Behavioural Memory Test. TMT scores were log-transformed.

**Table S5. Pearson correlations among cognitive test scores**

|                          | 1     | 2     | 3     | 4     | 5     | 6     | 7     | 8     | 9     | 10    | 11    | 12    | 13    | 14    | 15    | 16    | 17    | 18 |  |
|--------------------------|-------|-------|-------|-------|-------|-------|-------|-------|-------|-------|-------|-------|-------|-------|-------|-------|-------|----|--|
| 1. MMSE                  | 1     |       |       |       |       |       |       |       |       |       |       |       |       |       |       |       |       |    |  |
| 2. RBMT Immediate Recall | .49** | 1     |       |       |       |       |       |       |       |       |       |       |       |       |       |       |       |    |  |
| 3. RBMT Delayed Recall   | .49** | .89** | 1     |       |       |       |       |       |       |       |       |       |       |       |       |       |       |    |  |
| 4. Number Location       | .43** | .36** | .29** | 1     |       |       |       |       |       |       |       |       |       |       |       |       |       |    |  |
| 5. Key Search            | .17   | .29** | .23*  | .15   | 1     |       |       |       |       |       |       |       |       |       |       |       |       |    |  |
| 6. CDT                   | .47** | .39** | .38** | .20*  | .18*  | 1     |       |       |       |       |       |       |       |       |       |       |       |    |  |
| 7. Letter Fluency        | .45** | .35** | .30** | .37** | .19*  | .37** | 1     |       |       |       |       |       |       |       |       |       |       |    |  |
| 8. Animal Fluency 1 min  | .40** | .44** | .48** | .21*  | .07   | .30** | .51** | 1     |       |       |       |       |       |       |       |       |       |    |  |
| 9. Animal Fluency 2 min  | .34** | .49** | .50** | .20*  | .15   | .27** | .55** | .90** | 1     |       |       |       |       |       |       |       |       |    |  |
| 10. VAT Memory           | .53** | .47** | .48** | .28** | .16   | .32** | .22** | .34** | .31** | 1     |       |       |       |       |       |       |       |    |  |
| 11. VAT Naming           | .35** | .19*  | .19*  | .19*  | -.02  | .19*  | .24** | .17   | .18*  | .40** | 1     |       |       |       |       |       |       |    |  |
| 12. Digit Span fw score  | .43** | .22** | .18*  | .18   | .14   | .23*  | .35** | .23** | .27** | .13   | .23*  | 1     |       |       |       |       |       |    |  |
| 13. Digit Span fw span   | .38** | .26** | .21** | .12   | .12   | .23*  | .39** | .22** | .26** | .08   | .23*  | .90** | 1     |       |       |       |       |    |  |
| 14. Digit Span bw score  | .39** | .35** | .33** | .21*  | .05   | .35** | .32** | .23** | .30** | .17   | .17   | .43** | .41** | 1     |       |       |       |    |  |
| 15. Digit Span bw span   | .33** | .30** | .28** | .21*  | .05   | .23*  | .30** | .19*  | .27** | .14   | .25*  | .35** | .43** | .80** | 1     |       |       |    |  |
| 16. TMT A                | .49** | .22*  | .23*  | .16   | .01   | .33** | .40** | .34** | .27** | .36** | .32** | .25** | .22*  | .15   | .17   | 1     |       |    |  |
| 17. TMT B                | .51** | .28** | .24*  | .26*  | -.05  | .39** | .30** | .37** | .33** | .25*  | .37** | .22*  | .18   | .25*  | .19   | .58** | 1     |    |  |
| 18. DART IQ score        | .39** | .23** | .23** | .25** | .25** | .32** | .43** | .22** | .23** | .24** | .42** | .40** | .38** | .31** | .28** | .25** | .28** | 1  |  |

\*\*Correlation is significant at the 0.01 level (2-tailed), \*Correlation is significant at the 0.05 level (2-tailed). MMSE=Mini-Mental State Examination. RBMT=Rivermead Behavioural Memory Test. VAT=Visual Association Test. FW=Forward. BW=Backward. TMT=Trail Making Test. DART=Dutch Adult Reading Test.

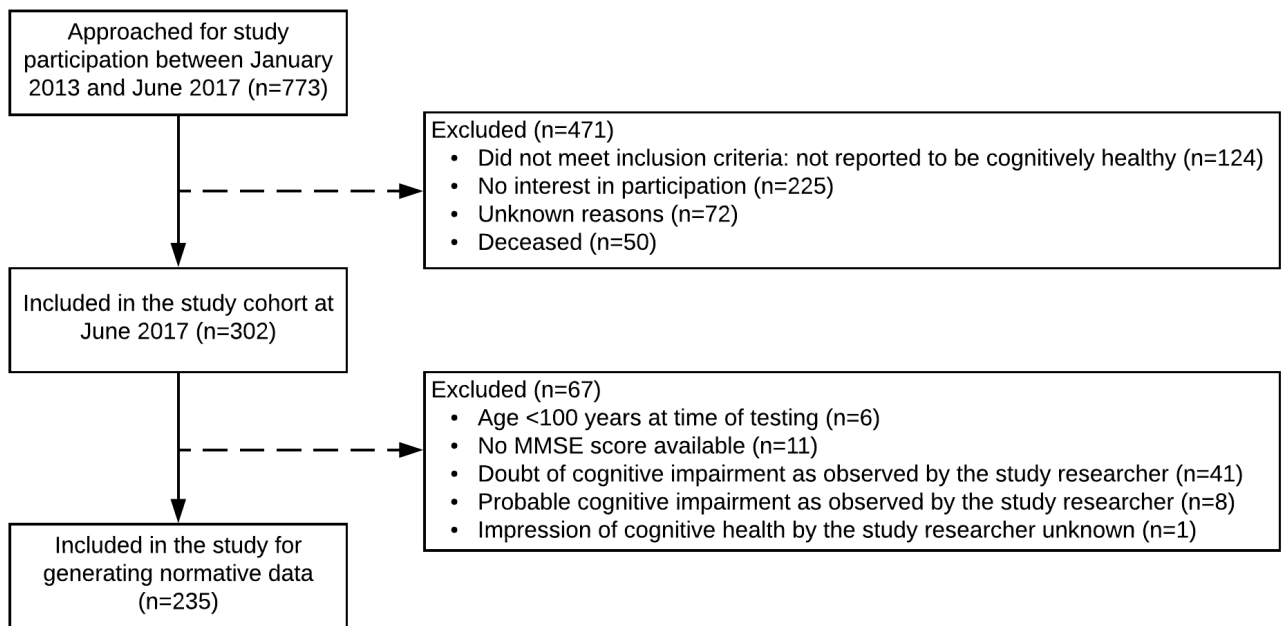

**Figure S1. Flowchart of study inclusion.** Number of centenarians approached for study participation and number of in- and excluded participants based on the different in- and exclusion criteria.

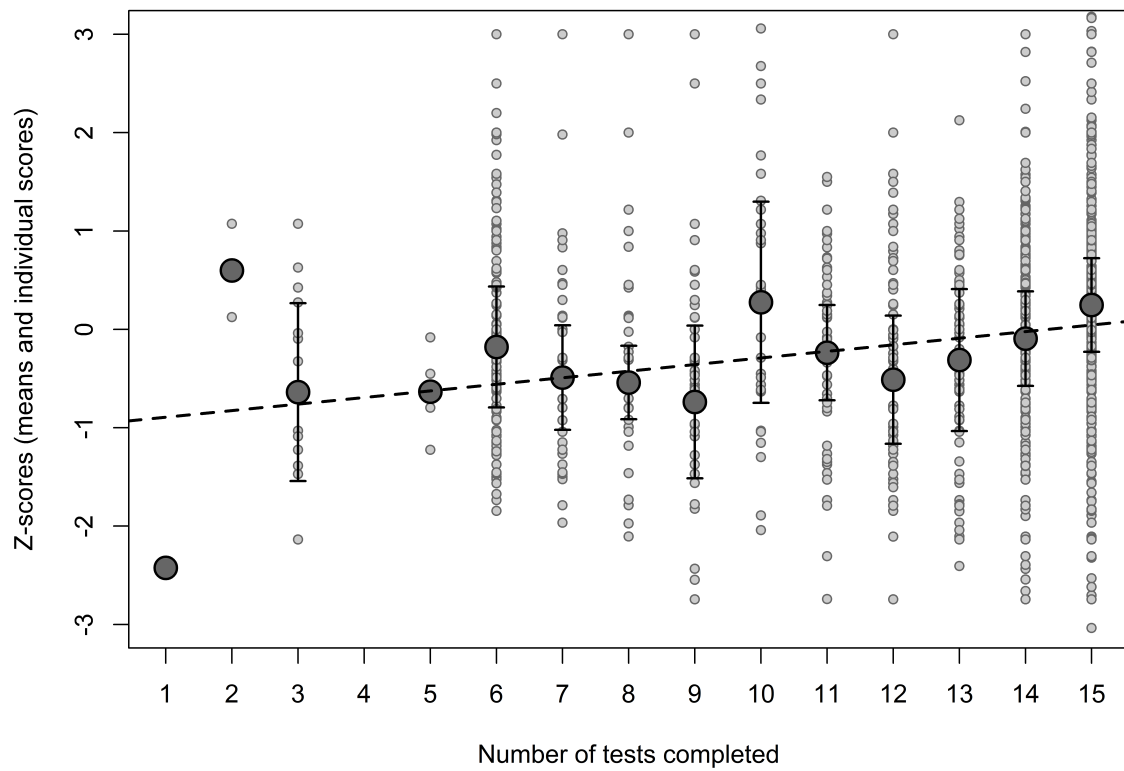

**Figure S2. Associations between the number of completed tests and overall cognitive test performance.** The 180 subjects who were offered all 15 tests were divided in groups based on the number of tests completed. The number of subjects per group were respectively: 1, 1, 5, 0, 1, 38, 6, 5, 6, 4, 7, 7, 7, 26, 65. Light grey dots: individual z-scores of the tests that could be completed. Dark grey dots/error bars: average z-scores and standard deviations across all subjects. We correlated the average z-scores with the number of tests that the subjects could complete using Pearson's correlation ( $r=.35, p<.001$ ).

## REFERENCES

- [1] Strauss E, Sherman EM, Spreen O. *A compendium of neuropsychological tests: Administration, norms, and commentary*: American Chemical Society, 2006.
- [2] Folstein MF, Folstein SE, McHugh PR. "Mini-mental state". A practical method for grading the cognitive state of patients for the clinician. *J Psychiatr Res.* 1975;**12**: 189-198.
- [3] Lezak MD. *Neuropsychological assessment*. USA: Oxford University Press, 2004.
- [4] Yassuda MS, Flaks MK, Viola LF, *et al.* Psychometric characteristics of the Rivermead Behavioural Memory Test (RBMT) as an early detection instrument for dementia and mild cognitive impairment in Brazil. *International Psychogeriatrics.* 2010;**22**: 1003-1011.
- [5] Lindeboom J, Schmand B, Tulner L, Walstra G, Jonker C. Visual association test to detect early dementia of the Alzheimer type. *J Neurol Neurosurg Psychiatry.* 2002;**73**: 126-133.
- [6] Lindeboom J, Schmand B, Christensen N. *Visual association test: VAT; handleiding*: Pits, 2003.
- [7] A Bouma JM, J Lindeboom & B Schmand *Manual Neuropsychological Diagnostics*. Amsterdam: Pearson, 2012.
- [8] Harrington KD, Lim YY, Ames D, *et al.* Using Robust Normative Data to Investigate the Neuropsychology of Cognitive Aging. *Arch Clin Neuropsychol.* 2017;**32**: 142-154.
- [9] Schmand B, Groenink SC, van den Dungen M. [Letter fluency: psychometric properties and Dutch normative data]. *Tijdschr Gerontol Geriatr.* 2008;**39**: 64-76.
- [10] Schmand B, Geerlings MI, Jonker C, Lindeboom J. Reading ability as an estimator of premorbid intelligence: does it remain stable in emergent dementia? *J Clin Exp Neuropsychol.* 1998;**20**: 42-51.
- [11] Cacho J, García-García R, Arcaya J, Vicente J, Lantada N. A proposal for application and scoring of the Clock Drawing Test in Alzheimer's disease. *Revista de neurologia.* 1999;**28**: 648-655.
- [12] Shulman KI. Clock-drawing: is it the ideal cognitive screening test? *Int J Geriatr Psychiatry.* 2000;**15**: 548-561.
- [13] Van Breukelen GJ, Vlaeyen JW. Norming clinical questionnaires with multiple regression: the Pain Cognition List. *Psychol Assess.* 2005;**17**: 336-344.
